# Supplementary figures and images for: Selection and Evaluation of Reference Genes for qRT-PCR in Spodoptera frugiperda (Lepidoptera: Noctuidae)
Source: MDPI journal article supplement (doi:10.3390/insects12100902), 2021-10-03

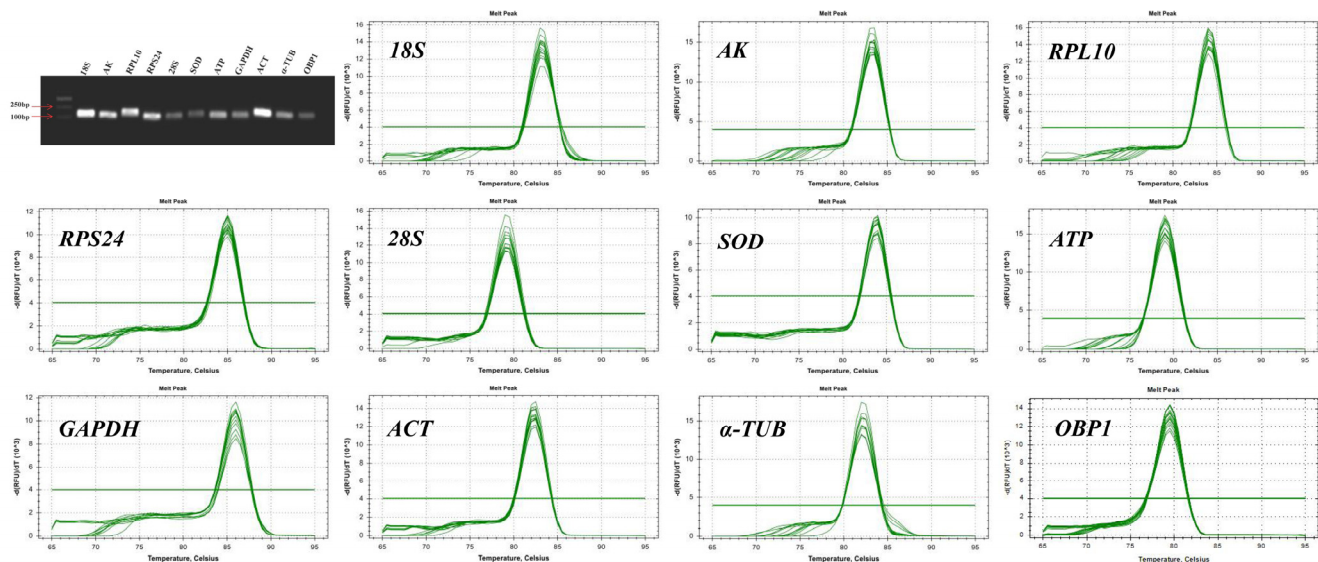

Figure S1. Amplification specificity of primers in RT-PCR and qRT-PCR.

Supplement: s1 [file s1]
